# Supplementary material for: Antimicrobial Susceptibility of Commensal Neisseria spp. in Parents and Their Children in Belgium: A Cross-Sectional Survey
Source: Preprints.org preprint supplement (doi:10.20944/preprints202406.0249.v1), 2024-06-05
Supplement: Supplementary file 1 [file supplementary]

## Sheet: Sheet1
sampleid	n_no_ab	n_azm	n_cro	n_cip	isolateid1	azm_mic1	cro_mic1	speciesid1	isolateid2	azm_mic2	cro_mic2	speciesid2	isolateid3	azm_mic3	cro_mic3	speciesid3	isolateid4	azm_mic4	cro_mic4	speciesid4	family	id	parent
Co000883	530	447	2	5	Co000883/1	2	.023	Neisseria flavescens subflava group	Co000883/2	2	.047	Neisseria sicca group	Co000883/3	2	.023	Neisseria flavescens subflava group	Co000883/4	.5	.19	Neisseria bacilliformis	32	32P1	1
Co000853	123	153	2	17	Co000853/1	6	.023	Neisseria sicca group	Co000853/2	3	.016	Neisseria flavescens subflava group	Co000853/3	2	.023	Neisseria flavescens subflava group	Co000853/4	2	1	Neisseria bacilliformis	19	19K1	0
Co000841	79	84	33	7	Co000841/1	256	256	Candida albicans	Co000841/2	2	.5	Neisseria bacilliformis	Co000841/3	0.25	1.5	Ligilactobacillus salivarius	Co000841/4	4	.5	Neisseria bacilliformis	14	14P1	1
Co000811	358	41	30	286	Co000811/1	2	1	Neisseria bacilliformis	Co000811/2	3	.094	Neisseria flavescens subflava group	Co000811/3	4	.016	Neisseria flavescens subflava group	Co000811/4	2	1	Neisseria bacilliformis	1	1P1	1
Co000856	64	28	0	20	Co000856/1	2	.75	Neisseria bacilliformis	Co000856/2	4	.047	Neisseria flavescens subflava group	Co000856/3	0.38	.38	Neisseria bacilliformis	Co000856/4	1.5	.75	Neisseria bacilliformis	21	21P1	1
Co000881	167	72	2	3	Co000881/1	3	.032	Neisseria sicca group	Co000881/2	1.5	.064	Neisseria flavescens subflava group	Co000881/3	1.5	.094	Neisseria elongata	Co000881/4	.5	.094	Neisseria elongata	31	31P1	1
Co000864	579	174	1	33	Co000864/1	3	.016	Neisseria flavescens subflava group	Co000864/2	2	.032	Neisseria sicca group	Co000864/3	3	.094	Neisseria elongata	Co000864/4	.38	.064	Neisseria elongata	24	24P1	1
Co000893	419	229	0	25	Co000893/1	3	.016	Neisseria flavescens subflava group	Co000893/2	1.5	.023	Neisseria flavescens subflava group	Co000893/3	12	.064	Neisseria flavescens subflava group	Co000893/4	.75	.064	Neisseria elongata	34	34K2	0
Co000898	25	14	0	7	Co000898/1	1	.19	Neisseria elongata	Co000898/2	2	.023	Neisseria flavescens subflava group	Co000898/3	1	.047	Neisseria flavescens subflava group	Co000898/4	1	.19	Neisseria elongata	36	36K1	0
Co000812	38	2	2	21	Co000812/1	1	.094	Neisseria elongata	Co000812/2	1.5	.125	Neisseria flavescens subflava group	Co000812/3	3	.094	Neisseria flavescens subflava group	Co000812/4	1	.094	Neisseria elongata	1	1P2	1
Co000851	1279	916	1	51	Co000851/1	4	.023	Neisseria sicca group	Co000851/2	3	.032	Neisseria flavescens subflava group	Co000851/3	3	.032	Neisseria flavescens subflava group	Co000851/4	.5	.032	Neisseria elongata	18	18K1	0
Co000831	1592	516	3	1736	Co000831/1	2	.032	Neisseria sicca group	Co000831/2	3	.047	Neisseria flavescens subflava group	Co000831/3	0.25	.023	Neisseria sicca group	Co000831/4	.5	.032	Neisseria elongata	10	10P1	1
Co000887	65	6	4	60	Co000887/1	.38	.064	Neisseria elongata	Co000887/2	.75	.016	Neisseria flavescens subflava group	Co000887/3	0.38	.064	Neisseria elongata	Co000887/4	.125	.032	Neisseria elongata	33	33K1	0
Co000865	571	247	1	8	Co000865/1	3	.016	Neisseria flavescens subflava group	Co000865/2	8	.125	Streptococcus salivarius	Co000865/3	12	.064	Neisseria sicca group	Co000865/4	4	.064	Neisseria flavescens subflava group	24	24K1	0
Co000837	2568	1788	26	142	Co000837/1	4	.125	Neisseria flavescens subflava group	Co000837/2	4	.125	Neisseria flavescens subflava group	Co000837/3	4	.125	Neisseria flavescens subflava group	Co000837/4	3	.125	Neisseria flavescens subflava group	13	13P2	1
Co000886	268	189	0	220	Co000886/1	.5	.064	Neisseria flavescens subflava group	Co000886/2	2	.094	Neisseria flavescens subflava group	Co000886/3	6	.032	Neisseria sicca group	Co000886/4	1.5	.094	Neisseria flavescens subflava group	33	33P2	1
Co000842	420	139	2	246	Co000842/1	12	.064	Neisseria sicca group	Co000842/2	4	.125	Neisseria flavescens subflava group	Co000842/3	3	.094	Neisseria flavescens subflava group	Co000842/4	3	.047	Neisseria flavescens subflava group	14	14K1	0
Co000878	166	130	186	136	Co000878/1	128	4	Pseudomonas fulva	Co000878/2	2	.032	Lecleria adecarboxylata	Co000878/3	3	.064	Neisseria flavescens subflava group	Co000878/4	3	.064	Neisseria flavescens subflava group	30	30K1	0
Co000895	147	14	0	38	Co000895/1	3	.023	Neisseria sicca group	Co000895/2	.5	.094	Neisseria elongata	Co000895/3	0.5	.032	Neisseria elongata	Co000895/4	3	.016	Neisseria flavescens subflava group	35	35K1	0
Co000854	28	4	1	4	Co000854/1	1.5	.094	Neisseria bacilliformis	Co000854/2	3	.047	Neisseria flavescens subflava group	Co000854/3	0.75	.125	Neisseria elongata	Co000854/4	4	.032	Neisseria flavescens subflava group	20	20P1	1
Co000836	2992	1895	214	2364	Co000836/1	4	.016	Neisseria flavescens subflava group	Co000836/2	3	.016	Neisseria flavescens subflava group	Co000836/3	3	.047	Neisseria flavescens subflava group	Co000836/4	3	.047	Neisseria flavescens subflava group	13	13P1	1
Co000846	340	56	69	60	Co000846/1	3	.125	Neisseria flavescens subflava group	Co000846/2	3	.064	Neisseria sicca group	Co000846/3	3	.064	Neisseria sicca group	Co000846/4	3	.19	Neisseria flavescens subflava group	16	16K1	0
Co000829	1641	813	0	59	Co000829/1	16	.047	Neisseria sicca group	Co000829/2	3	.032	Neisseria flavescens subflava group	Co000829/3	16	.047	Neisseria sicca group	Co000829/4	4	.032	Neisseria flavescens subflava group	5	5K2	0
Co000850	259	88	9	10	Co000850/1	.38	.094	Neisseria elongata	Co000850/2	1.5	.023	Neisseria sicca group	Co000850/3	3	.25	Neisseria flavescens subflava group	Co000850/4	3	.25	Neisseria flavescens subflava group	18	18P1	1
Co000838	2446	1409	39	226	Co000838/1	2	.064	Neisseria flavescens subflava group	Co000838/2	2	.125	Neisseria flavescens subflava group	Co000838/3	8	.047	Neisseria sicca group	Co000838/4	3	.032	Neisseria flavescens subflava group	13	13K1	0
Co000884	453	191	1	202	Co000884/1	2	.023	Neisseria flavescens subflava group	Co000884/2	3	.125	Neisseria flavescens subflava group	Co000884/3	12	.19	Neisseria sicca group	Co000884/4	4	.094	Neisseria flavescens subflava group	32	32K1	0
Co000867	1356	570	3	530	Co000867/1	2	.032	Neisseria sicca group	Co000867/2	12	.064	Pseudescherichia vulneris	Co000867/3	1.5	.047	Neisseria sicca group	Co000867/4	.75	.047	Neisseria flavescens subflava group	25	25K1	0
Co000852	198	78	22	10	Co000852/1	4	.5	No organism identification possible	Co000852/2	6	.064	Neisseria sicca group	Co000852/3	3	.75	Neisseria bacilliformis	Co000852/4	6	.064	Neisseria flavescens subflava group	19	19P1	1
Co000814	74	22	1	3	Co000814/1	3	.016	Neisseria flavescens subflava group	Co000814/2	8	.047	Neisseria sicca group	Co000814/3	2	.047	Neisseria flavescens subflava group	Co000814/4	1.5	.064	Neisseria flavescens subflava group	1	1K2	0
Co000840	990	753	0	147	Co000840/1	24	.094	Neisseria sicca group	Co000840/2	12	.032	Neisseria flavescens subflava group	Co000840/3	8	.032	Neisseria flavescens subflava group	Co000840/4	6	.023	Neisseria flavescens subflava group	11	11K1	0
Co000875	94	62	0	21	Co000875/1	8	.064	Escherichia coli	Co000875/2	.75	.38	Neisseria elongata	Co000875/3	0.5	.094	Neisseria elongata	Co000875/4	1.5	.064	Neisseria flavescens subflava group	29	29P1	1
Co000890	11	14	4	8	Co000890/1	3	.032	Neisseria flavescens subflava group	Co000890/2	.125	256	Lacticaseibacillus rhamnosus	Co000890/3	2	.19	Capnocytophaga sp	Co000890/4	2	.047	Neisseria flavescens subflava group	34	34P1	1
Co000858	110	21	0	42	Co000858/1	2	.064	Neisseria flavescens subflava group	Co000858/2	4	.125	Neisseria sicca group	Co000858/3	No growth. Moraxella		No organism identification possible	Co000858/4	3	.064	Neisseria flavescens subflava group	22	22P1	1
Co000834	1498	128	1	184	Co000834/1	4	.032	Neisseria flavescens subflava group	Co000834/2	3	.047	Neisseria flavescens subflava group	Co000834/3	4	.047	Neisseria flavescens subflava group	Co000834/4	3	.047	Neisseria flavescens subflava group	9	9K1	0
Co000868	185	14	3	12	Co000868/1	256	256	Candida dubliniensis	Co000868/2	6	.064	Neisseria sicca group	Co000868/3	1	.064	Neisseria oralis	Co000868/4	1.5	.125	Neisseria flavescens subflava group	26	26P1	1
Co000830	2547	1886	11	638	Co000830/1	3	.064	Neisseria flavescens subflava group	Co000830/2	4	.047	Neisseria flavescens subflava group	Co000830/3	16	.064	Neisseria sicca group	Co000830/4	3	.064	Neisseria flavescens subflava group	9	9P1	1
Co000843	950	86	1	225	Co000843/1	2	.016	Neisseria flavescens subflava group	Co000843/2	.75	.023	Neisseria sicca group	Co000843/3	3	.064	Neisseria flavescens subflava group	Co000843/4	3	.094	Neisseria flavescens subflava group	14	14K2	0
Co000816	93	83	1	24	Co000816/1	12	.032	Neisseria flavescens subflava group	Co000816/2	1.5	.032	Neisseria sicca group	Co000816/3	8	.047	Neisseria flavescens subflava group	Co000816/4	16	.032	Neisseria flavescens subflava group	2	2K1	0
Co000885	2059	493	0	1863	Co000885/1	3	.032	Neisseria flavescens subflava group	Co000885/2	1.5	.064	Neisseria flavescens subflava group	Co000885/3	4	.047	Neisseria flavescens subflava group	Co000885/4	2	.047	Neisseria flavescens subflava group	33	33P1	1
Co000891	662	179	2	298	Co000891/1	2	.023	Neisseria flavescens subflava group	Co000891/2	12	.016	Neisseria flavescens subflava group	Co000891/3	2	.064	Neisseria flavescens subflava group	Co000891/4	2	.064	Neisseria flavescens subflava group	34	34P2	1
Co000857	677	215	0	13	Co000857/1	12	.125	Neisseria sicca group	Co000857/2	3	.125	Neisseria flavescens subflava group	Co000857/3	6	.125	Neisseria flavescens subflava group	Co000857/4	4	.125	Neisseria flavescens subflava group	21	21K1	0
Co000896	10	18	0	14	Co000896/1	4	.064	Neisseria flavescens subflava group	Co000896/2	4	.016	Neisseria flavescens subflava group	Co000896/3	16	.047	Neisseria sicca group	Co000896/4	3	.016	Neisseria flavescens subflava group	35	35K2	0
Co000815	136	62	28	176	Co000815/1	1	.064	Neisseria oralis	Co000815/2	4	.023	Neisseria flavescens subflava group	Co000815/3	3	.032	Neisseria flavescens subflava group	Co000815/4	2	.094	Neisseria oralis	2	2P1	1
Co000825	977	545	1	60	Co000825/1	6	.047	Neisseria sicca group	Co000825/2	4	.016	Neisseria flavescens subflava group	Co000825/3	6	.047	Neisseria sicca group	Co000825/4	2	.047	Neisseria oralis	8	8K1	0
Co000833	1133	458	0	247	Co000833/1	1.5	.023	Neisseria flavescens subflava group	Co000833/2	1	.023	Neisseria flavescens subflava group	Co000833/3	4	.064	Neisseria sicca group	Co000833/4	2	.047	Neisseria oralis	12	12K1	0
Co000839	1948	1091	12	69	Co000839/1	8	.064	Neisseria sicca group	Co000839/2	3	.064	Neisseria flavescens subflava group	Co000839/3	3	.125	Neisseria flavescens subflava group	Co000839/4	8	.064	Neisseria sicca group	11	11P1	1
Co000849	70	10	0	7	Co000849/1	1.5	.25	Neisseria sicca group	Co000849/2	3	.032	Neisseria elongata	Co000849/3	0.19	.032	Neisseria sicca group	Co000849/4	3	.032	Neisseria sicca group	17	17K1	0
Co000866	295	106	26	18	Co000866/1	2	.5	Neisseria bacilliformis	Co000866/2	2	.032	Neisseria sicca group	Co000866/3	4	.047	Neisseria sicca group	Co000866/4	1.5	.047	Neisseria sicca group	25	25P1	1
Co000880	148	111	0	1	Co000880/1	4	.064	Neisseria sicca group	Co000880/2	1.5	.016	Neisseria flavescens subflava group	Co000880/3	1	.032	Neisseria flavescens subflava group	Co000880/4	2	.064	Neisseria sicca group	30	30K3	0
Co000855	10	5	2	1	Co000855/1	1.5	.094	Neisseria bacilliformis	Co000855/2	256	256	Candida albicans	Co000855/3	3	.047	Neisseria sicca group	Co000855/4	3	.047	Neisseria sicca group	20	20K1	0
Co000820	7	2	0	0	Co000820/1	8	.047	Neisseria sicca group	Co000820/2	1.5	.016	Neisseria flavescens subflava group	Co000820/3	0.19	.016	Neisseria elongata	Co000820/4	6	.047	Neisseria sicca group	4	4K1	0
Co000860	280	155	1	202	Co000860/1	2	.032	Neisseria sicca group	Co000860/2	4	.125	Neisseria sicca group	Co000860/3	12	.094	Neisseria sicca group	Co000860/4	3	.032	Neisseria sicca group	22	22K2	0
Co000899	10	6	0	11	Co000899/1	1	.023	Neisseria flavescens subflava group	Co000899/2	1	.023	Neisseria flavescens subflava group	Co000899/3	1.5	.047	Neisseria flavescens subflava group	Co000899/4	16	.064	Neisseria sicca group	36	36K2	0
Co000819	434	230	11	131	Co000819/1	4	.19	Neisseria sicca group	Co000819/2	3	.064	Neisseria flavescens subflava group	Co000819/3	2	.094	Neisseria flavescens subflava group	Co000819/4	3	.064	Neisseria sicca group	4	4P1	1
Co000828	526	65	0	224	Co000828/1	3	.064	Neisseria flavescens subflava group	Co000828/2	3	.064	Neisseria sicca group	Co000828/3	8	.064	Neisseria sicca group	Co000828/4	6	.047	Neisseria sicca group	5	5K1	0
Co000876	15	5	0	34	Co000876/1	3	.125	Neisseria flavescens subflava group	Co000876/2	3	.032	Neisseria sicca group	Co000876/3	3	.19	Neisseria flavescens subflava group	Co000876/4	4	.047	Neisseria sicca group	29	29K1	0
Co000832	340	108	0	221	Co000832/1	.38	.125	Neisseria flavescens subflava group	Co000832/2	4	.19	Neisseria flavescens subflava group	Co000832/3	1.5	.016	Neisseria flavescens subflava group	Co000832/4	6	.064	Neisseria sicca group	10	10K1	0
Co000827	688	257	1	139	Co000827/1	4	.064	Neisseria flavescens subflava group	Co000827/2	3	.064	Neisseria sicca group	Co000827/3	12	.064	Neisseria sicca group	Co000827/4	3	.064	Neisseria sicca group	5	5P2	1
Co000844	1849	1721	2	578	Co000844/1	.25	.125	Neisseria elongata	Co000844/2	6	.047	Neisseria sicca group	Co000844/3	0.25	.19	Neisseria elongata	Co000844/4	8	.047	Neisseria sicca group	15	15P1	1
Co000823	722	132	3	1208	Co000823/1	.19	.5	No organism identification possible	Co000823/2	12	.016	Neisseria flavescens subflava group	Co000823/3	0.25	.064	Neisseria elongata	Co000823/4	6	.064	Neisseria sicca group	7	7K1	0
Co000882	1458	291	3	340	Co000882/1	3	.047	Neisseria sicca group	Co000882/2	3	.047	Neisseria sicca group	Co000882/3	1.5	.047	Neisseria flavescens subflava group	Co000882/4	2	.047	Neisseria sicca group	31	31K1	0
Co000818	19	3	0	12	Co000818/1	1.5	.094	Neisseria flavescens subflava group	Co000818/2	3	.047	Neisseria flavescens subflava group	Co000818/3	12	.047	Neisseria sicca group	Co000818/4	6	.047	Neisseria sicca group	3	3K1	0
Co000877	794	524	0	934	Co000877/1	3	.047	Neisseria sicca group	Co000877/2	.5	.047	Neisseria elongata	Co000877/3	2	.023	Neisseria flavescens subflava group	Co000877/4	2	.032	Neisseria sicca group	30	30P1	1
Co000888	11	4	0	17	Co000888/1	.38	.047	Neisseria elongata	Co000888/2	.38	.064	Neisseria elongata	Co000888/3	3	.064	Neisseria flavescens subflava group	Co000888/4	.25	.032	Neisseria sicca group	33	33K2	0
Co000826	530	119	3	373	Co000826/1	16	.094	Neisseria sicca group	Co000826/2	4	.023	Neisseria flavescens subflava group	Co000826/3	3	.016	Neisseria flavescens subflava group	Co000826/4	16	.047	Neisseria sicca group	5	5P1	1
Co000879	212	87	1	52	Co000879/1	3	.064	Neisseria sicca group	Co000879/2	1	.032	Neisseria flavescens subflava group	Co000879/3	3	.047	Neisseria sicca group	Co000879/4	.25	.032	Neisseria sicca group	30	30K2	0
Co000835	1377	347	33	27	Co000835/1	6	.094	Neisseria flavescens subflava group	Co000835/2	2	.032	Neisseria sicca group	Co000835/3	6	.064	Neisseria flavescens subflava group	Co000835/4	1.5	.032	Neisseria sicca group	12	12P1	1
Co000845	578	218	4	380	Co000845/1	4	.047	Neisseria sicca group	Co000845/2	3	.064	Neisseria flavescens subflava group	Co000845/3	4	.064	Neisseria sicca group	Co000845/4	8	.032	Neisseria sicca group	15	15K1	0
Co000824	1198	329	1	144	Co000824/1	.125	256	Lacticaseibacillus paracasei	Co000824/2	4	.064	Neisseria sicca group	Co000824/3	2	.032	Neisseria flavescens subflava group	Co000824/4	3	.064	Neisseria sicca group	8	8P1	0
Co000861	223	43	0	41	Co000861/1	8	.047	Neisseria sicca group	Co000861/2	1.5	.047	Neisseria flavescens subflava group	Co000861/3	2	.047	Neisseria flavescens subflava group	Co000861/4	2	.032	Neisseria sicca group	22	22K3	0
Co000813	138	24	0	72	Co000813/1	.19	.125	Neisseria elongata	Co000813/2	6	.032	Neisseria sicca group	Co000813/3	6	.023	Neisseria flavescens subflava group	Co000813/4	6	.032	Neisseria sicca group	1	1K1	0
Co000874	893	291	0	498	Co000874/1	3	.094	Neisseria sicca group	Co000874/2	1.5	.047	Neisseria flavescens subflava group	Co000874/3	2	.032	Neisseria flavescens subflava group	Co000874/4	3	.047	Neisseria sicca group	28	28K1	0
Co000897	356	754	0	33	Co000897/1	3	.064	Neisseria flavescens subflava group	Co000897/2	1.5	.016	Neisseria flavescens subflava group	Co000897/3	12	.032	Neisseria sicca group	Co000897/4	4	.032	Neisseria sicca group	36	36P1	0
Co000862	16	10	0	2	Co000862/1	4	.047	Neisseria sicca group	Co000862/2	3	.094	Neisseria flavescens subflava group	Co000862/3	3	.047	Neisseria sicca group	Co000862/4	3	.047	Neisseria sicca group	23	23P1	1
Co000847	271	60	1	40	Co000847/1	.38	.064	Neisseria elongata	Co000847/2	8	.032	Neisseria sicca group	Co000847/3	0.19	.064	Neisseria elongata	Co000847/4	8	.032	Neisseria sicca group	17	17P1	1
Co000869	245	59	0	70	Co000869/1	.25	.047	Neisseria elongata	Co000869/2	1.5	.125	Neisseria flavescens subflava group	Co000869/3	2	.047	Neisseria sicca group	Co000869/4	2	.19	Neisseria sicca group	26	26K1	0
Co000859	883	324	0	515	Co000859/1	2	.064	Neisseria flavescens subflava group	Co000859/2	3	.032	Neisseria sicca group	Co000859/3	2	.032	Neisseria sicca group	Co000859/4	3	.023	Neisseria sicca group	22	22K1	0
Co000873	949	104	20	7	Co000873/1	3	.032	Neisseria sicca group	Co000873/2	8	.25	Neisseria sicca group	Co000873/3	0.19	256	Lacticaseibacillus paracasei	Co000873/4	3	.032	Neisseria sicca group	28	28P1	1
Co000822	306	121	0	415	Co000822/1	2	.032	Neisseria flavescens subflava group	Co000822/2	4	.032	Neisseria flavescens subflava group	Co000822/3	4	.064	Neisseria sicca group	Co000822/4	4	.064	Neisseria sicca group	7	7P1	1
Co000894	1524	2230	8	3	Co000894/1	2	.023	Neisseria flavescens subflava group	Co000894/2	3	.016	Neisseria flavescens subflava group	Co000894/3	3	.016	Neisseria flavescens subflava group	Co000894/4	2	.023	Neisseria sicca group	35	35P1	1
Co000870	20	5	5	6	Co000870/1	.75	.094	Neisseria flavescens subflava group	Co000870/2	6	.064	Neisseria sicca group	Co000870/3	16	.125	Streptococcus vestibularis						26K2	0
Co000817	52	14	8	8	Co000817/1	4	.064	Neisseria flavescens subflava group	Co000817/2	4	.064	Neisseria flavescens subflava group	Co000817/3	4	.064	Neisseria flavescens subflava group	Co000817/4	256	256	Candida albicans	3	3P1	1
Co000848	283	145	100	358	Co000848/1	256	12	Pseudomonas aeruginosa													16	16P1	1
Co000821	60	9	4	25	Co000821/1	3	.023	Neisseria flavescens subflava group	Co000821/2	6	.032	Neisseria flavescens subflava group	Co000821/3	3	.023	Neisseria flavescens subflava group	Co000821/4	.5	4	Leuconostoc lactis	6	6P1	1
Co000871	32	11	4	14	Co000871/1	3	.5	Neisseria flavescens subflava group	Co000871/2	3	.75	Neisseria flavescens subflava group	Co000871/3	0.75	.125	Neisseria elongata	Co000871/4	.125	256	Lacticaseibacillus paracasei	27	27P1	1
Co000872	197	37	7	38	Co000872/1	.75	.19	Neisseria elongata	Co000872/2	8	.064	Neisseria elongata	Co000872/3	0.38	.19	Neisseria elongata	Co000872/4	.064	.064	No organism identification possible	27	27K1	0
Co000863	160	42	64	36	Co000863/1	1.5	8	Acinetobacter courvalinii	Co000863/2	8	.094	Neisseria flavescens subflava group	Co000863/3	3	3	Sphingobacterium mizutaii	Co000863/4	3	3	Sphingobacterium mizutaii	23	23K1	0
Co000892	5	4	0	1	Co000892/1	3	.023	Neisseria flavescens subflava group	Co000892/2	.094	.047	Neisseria elongata	Co000892/3	0.125	.75	Moraxella catarrhalis	Co000892/4	2	.38	Leptotrichia trevisanii	34	34K1	0
Co000889	0	0	0	0																	33	33K3	0
																					33	33K3	0
